# Supplementary material for: Guest-induced capsule formation based on concerted interactions in water at neutral pH
Source: Royal Society of Chemistry journal article supplement (doi:10.1039/c0cc02394a), 2010-01-01
Supplement: addcorr.doc [file addcorr.doc]

Addition and Correction for ChemComm:

**Guest-induced capsule formation based on concerted interactions in water at neutral pH**

Carmela Bonaccorso, Antonio Ciadamidaro, Carmelo Sgarlata, Domenico Sciotto and Giuseppe Arena

*Chem. Commun.*, 2010, DOI: 10.1039/c0cc02394a

A protocol number was missing from the Acknowledgements. The correct version is:

We are grateful to MIUR (PRIN 2008F5A3AF_005) and University of Catania for funding. Dr A. Giuffrida, G. Grasso, V. Zito (CNR-IBB) and D. Garozzo (CNR-ICTP) are acknowledged for performing and discussing the ESI-MS experiments; we are grateful to Dr Peter Gans (www.hyperquad.co.uk) for helping with and discussing the diffusion data treatment.

The Royal Society of Chemistry apologises for this error and any consequent inconvenience to authors and readers.

**Additions and corrections can be viewed online by accessing the original article to which they apply.**
